# Supplementary material for: Red-edge-wavelength finely-tunable laser action from new BODIPY dyes
Source: Royal Society of Chemistry journal article supplement (doi:10.1039/b925561c), 2010-01-01
Supplement: b925561c.pdf [file b925561c.pdf]

## Supporting Information

### Red-Edge Wavelength-Finely Tunable Laser Action from New Bodipy Dyes

M. J. Ortiz,<sup>\*a</sup> I. Garcia-Moreno,<sup>b</sup> A. R. Agarrabeitia,<sup>a</sup> G. Duran-Sampedro,<sup>a</sup> A. Costela,<sup>b</sup> R. Sastre,<sup>c</sup> F. López Arbeloa,<sup>d</sup> J. Bañuelos Prieto<sup>d</sup> and I. López Arbeloa<sup>d</sup>

<sup>a</sup>*Departamento de Química Orgánica I (DQO), Facultad de Ciencias Químicas, Universidad Complutense, 28040 Madrid, Spain.*

<sup>b</sup>*Instituto de Química-Física “Rocasolano” (IQFR), CSIC, Serrano 119, 28006 Madrid, Spain.*

<sup>c</sup>*Instituto de Ciencia y Tecnología de Polímeros (ICTP), CSIC, Juan de la Cierva 3, 28006 Madrid, Spain.*

<sup>d</sup>*Departamento de Química Física, UPV-EHU, Apartado 644, 48080 Bilbao, Spain.*

[mjortiz@quim.ucm.es](mailto:mjortiz@quim.ucm.es)

| Table of Contents                                                      | Page |
|------------------------------------------------------------------------|------|
| Synthesis of BODIPYs 1-4                                               | S2   |
| Combustion Analysis Data                                               | S4   |
| <sup>1</sup> H and <sup>13</sup> C NMR spectra                         | S5   |
| Electronic density maps of the HOMO and LUMO orbitals for dyes 2 and 3 | S12  |
| References                                                             | S13  |

## Synthesis of BODIPY 1-4.

**Synthesis of 4,4-Difluoro-3,5-bis(*p*-formylphenyl)-8-(4-tolyl)-4-bora-3a,4a-diaza-*s*-indacene (2).** Compound **2** was synthesized from **1**<sup>1</sup> in Suzuki cross-coupling reaction under both microwave and ultrasonic irradiation conditions.

Suzuki cross-coupling reaction under microwave irradiation: Compound **1** (87 mg, 0.25 mmol) was dissolved in DME (20 mL). *p*-Formylphenyl boronic acid (95 mg, 0.63 mmol) and Na<sub>2</sub>CO<sub>3</sub> (79 mg, 0.75 mmol) were added in the presence of a catalytic amount of tetrakis(triphenylphosphine)palladium (8.6 mg, 0.008 mmol). The reaction mixture was stirred under microwave irradiation for 30 min at 150 °C with a power of 200 W and 20 atm. After addition of H<sub>2</sub>O (50 mL), the organic layer was extracted with EtOAc, dried over MgSO<sub>4</sub>, filtered and concentrated to dryness. Flash chromatography using hexane/EtOAc (8:2) afforded compound **2** (57 mg, 46% yield) as dark red crystals. M.p. 142.8-143.3 °C; <sup>1</sup>H NMR (300 MHz, CDCl<sub>3</sub>): δ 9.97 (2 H, s, CHO), 7.95 (4 H, d, *J* = 8.4 Hz, aromatic), 7.85 (4 H, d, *J* = 8.4 Hz, aromatic), 7.43 (2 H, d, *J* = 8.1 Hz, aromatic), 7.30 (2 H, d, *J* = 8.1 Hz, aromatic), 6.93 (2 H, d, *J* = 4.2 Hz, pyrrole), 6.63 (2 H, d, *J* = 4.2 Hz, pyrrole), 2.43 (3 H, s, CH<sub>3</sub>); <sup>13</sup>C NMR (75 MHz, CDCl<sub>3</sub>): δ 191.8 (CHO), 157.2 (C=N), 141.3, 138.2, 137.1, 136.5, 131.7, 131.1, 130.8, 130.1, 129.6, 129.3, 125.6, 121.3 (aromatic and C=C), 21.6 (CH<sub>3</sub>); IR (neat): 2853, 2734 (CHO), 1699 (C=O), 1540 cm<sup>-1</sup>; MS *m/z* (%): 490 (M<sup>+</sup>, 61), 283 (100), 255 (95), 157 (47); HR-MS-ESI<sup>+</sup>: calcd for (C<sub>30</sub>H<sub>21</sub>BF<sub>2</sub>N<sub>2</sub>O<sub>2</sub>+H<sup>+</sup>) 491.1700 found 491.1733; HPLC (reverse phase C<sub>18</sub> column, CH<sub>3</sub>CN-H<sub>2</sub>O 9:1, flow rate 2 mL min<sup>-1</sup>, λ<sub>anal</sub> 550 nm): R<sub>t</sub> = 1.94 min (98% purity).

Suzuki cross-coupling reaction under ultrasound irradiation: Compound **1** (48 mg, 0.14 mmol), 4-formylphenyl boronic acid (126 mg, 0.84 mmol), Na<sub>2</sub>CO<sub>3</sub> (89 mg, 0.84 mmol) and a catalytic amount of tetrakis(triphenylphosphine)palladium (10 mg, 0.009 mmol) were stirred under ultrasound irradiation for 15 h at 75 °C with a power of 720 W. Flash chromatography using hexane/EtOAc (8:2) afforded compound **2** (44 mg, 50% yield).

**Synthesis of 4,4-Difluoro-3,5-bis(*p*-2,2-dimethoxycarbonylvinylphenyl)-8-(4-tolyl)-4-bora-3a,4a-diaza-*s*-indacene (3).** To a solution of TiCl<sub>4</sub> (1.0 M in CH<sub>2</sub>Cl<sub>2</sub>) (0.8 mL, 0.8 mmol) in 30 mL of dry THF at 0 °C and under an argon atmosphere, were added

dropwise a solution of compound **2** (46 mg, 0.09 mmol) and dimethyl malonate (29 mg, 0.22 mmol) in dry THF. The reaction mixture was stirred at 0 °C for 30 min and then, a solution of pyridine (0.12 mL, 1.4 mmol) in dry THF was added. The reaction was stirred at RT for 24 h before being quenched with H<sub>2</sub>O and extracted with ether. The combined organic phases were washed with H<sub>2</sub>O, saturated NaHCO<sub>3</sub> solution and brine. The extract was dried over MgSO<sub>4</sub>, filtered and concentrated to dryness. Flash chromatography using hexane/EtOAc (8:2) afforded compound **3** (34 mg, 47%) as dark blue crystals. M.p. 135.0-135.5 °C; <sup>1</sup>H NMR (300 MHz, CDCl<sub>3</sub>): δ 7.93 (4 H, d, *J* = 8.4 Hz, aromatic), 7.79 (2 H, s, 2 CH=C), 7.50 (6 H, m, aromatic), 7.37 (2 H, d, *J* = 6.8 Hz, aromatic), 6.97 (2 H, d, *J* = 4.3 Hz, pyrrole), 6.69 (2 H, d, *J* = 4.3 Hz, pyrrole), 3.88 (12 H, s, 4 CH<sub>3</sub>O), 2.53 (3 H, s, CH<sub>3</sub>); <sup>13</sup>C NMR (75 MHz, CDCl<sub>3</sub>): 167.0 (COO), 164.5 (COO), 157.6 (C=N), 142.1, 134.6, 133.7, 131.3, 130.7, 129.9, 129.4, 129.1, 126.1, 121.1 (aromatic and CH=C), 52.8 (CH<sub>3</sub>O), 52.7 (CH<sub>3</sub>O), 21.5 (CH<sub>3</sub>); IR (neat): 1732, 1682 (C=O), 1597 (C=C) cm<sup>-1</sup>; MS *m/z* (%): 718 (M<sup>+</sup>, 100), 59 (32); HR-MS-ESI<sup>+</sup>: calcd for C<sub>40</sub>H<sub>33</sub>BF<sub>2</sub>N<sub>2</sub>O<sub>8</sub> (M+NH<sub>4</sub>)<sup>+</sup> 736.2643 found 736.2642; HPLC (reverse phase C<sub>18</sub> column, CH<sub>3</sub>CN-H<sub>2</sub>O 9:1, flow rate 2 mL min<sup>-1</sup>, λ<sub>anal</sub> 500 nm): *R*<sub>t</sub> = 2.53 min (99% purity).

**Synthesis of 4,4-Difluoro-3,5-bis(*p*-2,2-dicyanovinylphenyl)-8-(4-tolyl)-4-bora-3a,4a-diaza-*s*-indacene (**4**).** A mixture of compound **2** (52 mg, 0.09 mmol), malononitrile (14.5 mg, 0.22 mmol), β-alanine (6 mg, 0.06 mmol) and 6 mL acetic acid in 30 mL of toluene was refluxed for 24 h. The H<sub>2</sub>O generated during the condensation was azeotropically removed by using a Dean Stark trap. The mixture was then cooled, diluted with EtOAc, and washed with H<sub>2</sub>O. The organic layer was dried over MgSO<sub>4</sub>, filtered and concentrated to dryness. Flash chromatography using hexane/EtOAc (8:2) afforded compound **4** (13 mg, 21%) as dark blue crystals. M.p. 140.2-140.7 °C; <sup>1</sup>H NMR (500 MHz, CDCl<sub>3</sub>): δ 7.98 (4 H, d, *J* = 8.5 Hz, aromatic), 7.91 (4 H, d, *J* = 8.5 Hz, aromatic), 7.70 (2 H, s, 2 CH=C), 7.44 (2 H, d, *J* = 8.0 Hz, aromatic), 7.31 (2 H, d, *J* = 8.0 Hz, aromatic), 6.96 (2 H, d, *J* = 4.2 Hz, pyrrole), 6.68 (2 H, d, *J* = 4.2 Hz, pyrrole), 2.44 (3 H, s, CH<sub>3</sub>); <sup>13</sup>C NMR (125 MHz, CDCl<sub>3</sub>): 159.1 (CH=C(CN)<sub>2</sub>), 159.0 (CH=C(CN)<sub>2</sub>), 156.8 (C=N), 145.1, 141.9, 138.5, 137.9, 132.4, 131.9, 131.8, 131.5, 131.3, 131.1, 131.0, 130.8, 129.7, 128.7, 121.9 (aromatic), 114.1 (CN), 113.0 (CN), 83.6 (2 (CN)<sub>2</sub>C=CH), 21.5 (CH<sub>3</sub>); IR (neat): 2229 (CN), 1538 cm<sup>-1</sup>; MS *m/z* (%): 586

( $M^+$ , 100), 306 (40), 219 (28), 131 (41), 69 (79), 55 (51); HPLC (reverse phase  $C_{18}$  column,  $CH_3CN-H_2O$  9:1, flow rate  $2\text{ mL min}^{-1}$ ,  $\lambda_{\text{anal}}$  570 nm):  $R_t = 2.57\text{ min}$  (98% purity).

### Combustion Analysis Data

| Compd    | Molecular Formula         | Calculated |      |       | Found |      |       |
|----------|---------------------------|------------|------|-------|-------|------|-------|
|          |                           | C          | H    | N     | C     | H    | N     |
| <b>1</b> | $C_{16}H_{11}BCl_2F_2N_2$ | 54.75      | 3.16 | 7.98  | 54.72 | 3.19 | 7.68  |
| <b>2</b> | $C_{30}H_{21}BF_2N_2O_2$  | 73.49      | 4.32 | 5.71  | 73.18 | 4.59 | 5.52  |
| <b>3</b> | $C_{40}H_{33}BF_2N_2O_8$  | 66.86      | 4.63 | 3.90  | 66.64 | 4.53 | 3.82  |
| <b>4</b> | $C_{36}H_{21}BF_2N_6$     | 73.74      | 3.61 | 14.33 | 73.57 | 3.53 | 14.18 |

# $^1\text{H}$ and $^{13}\text{C}$ NMR spectra

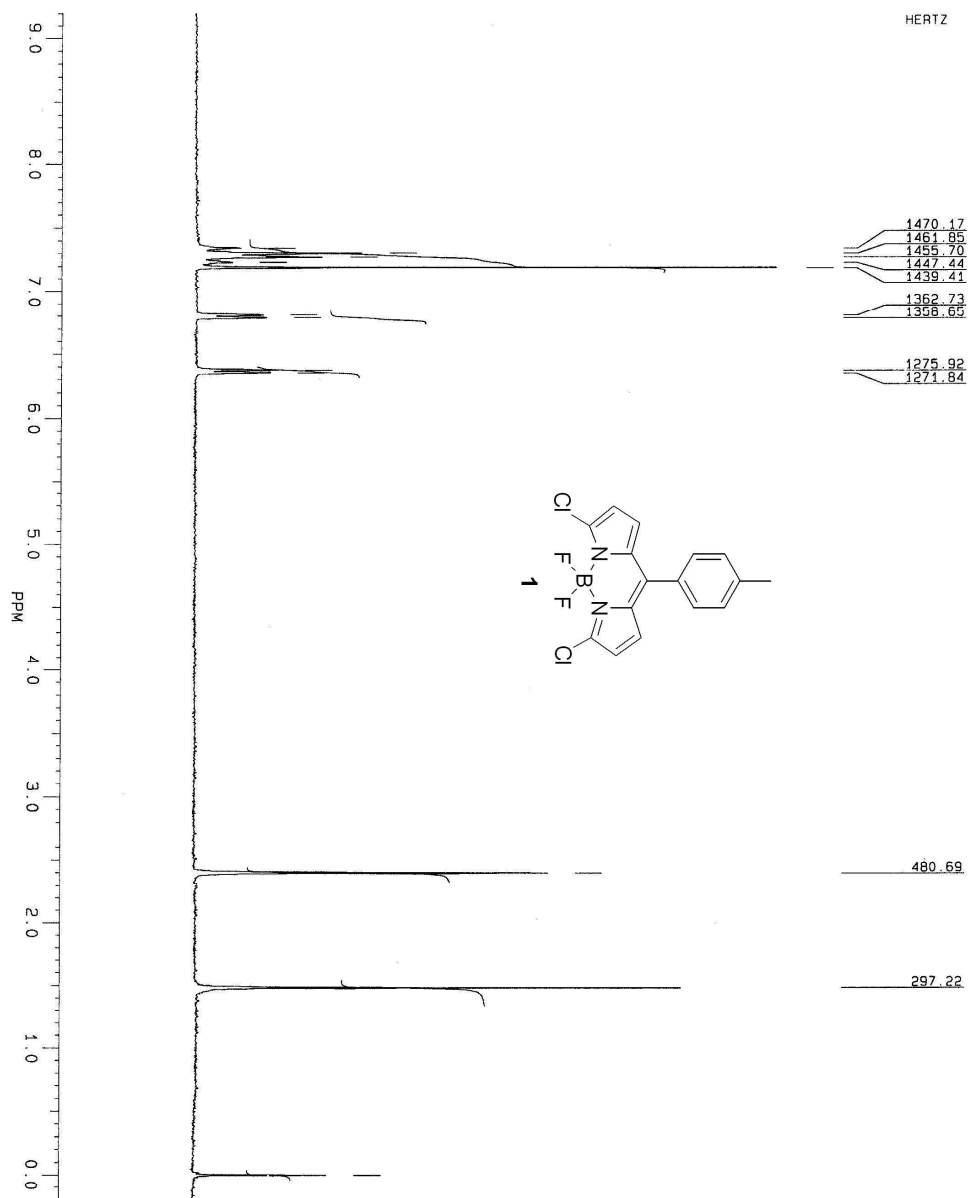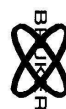

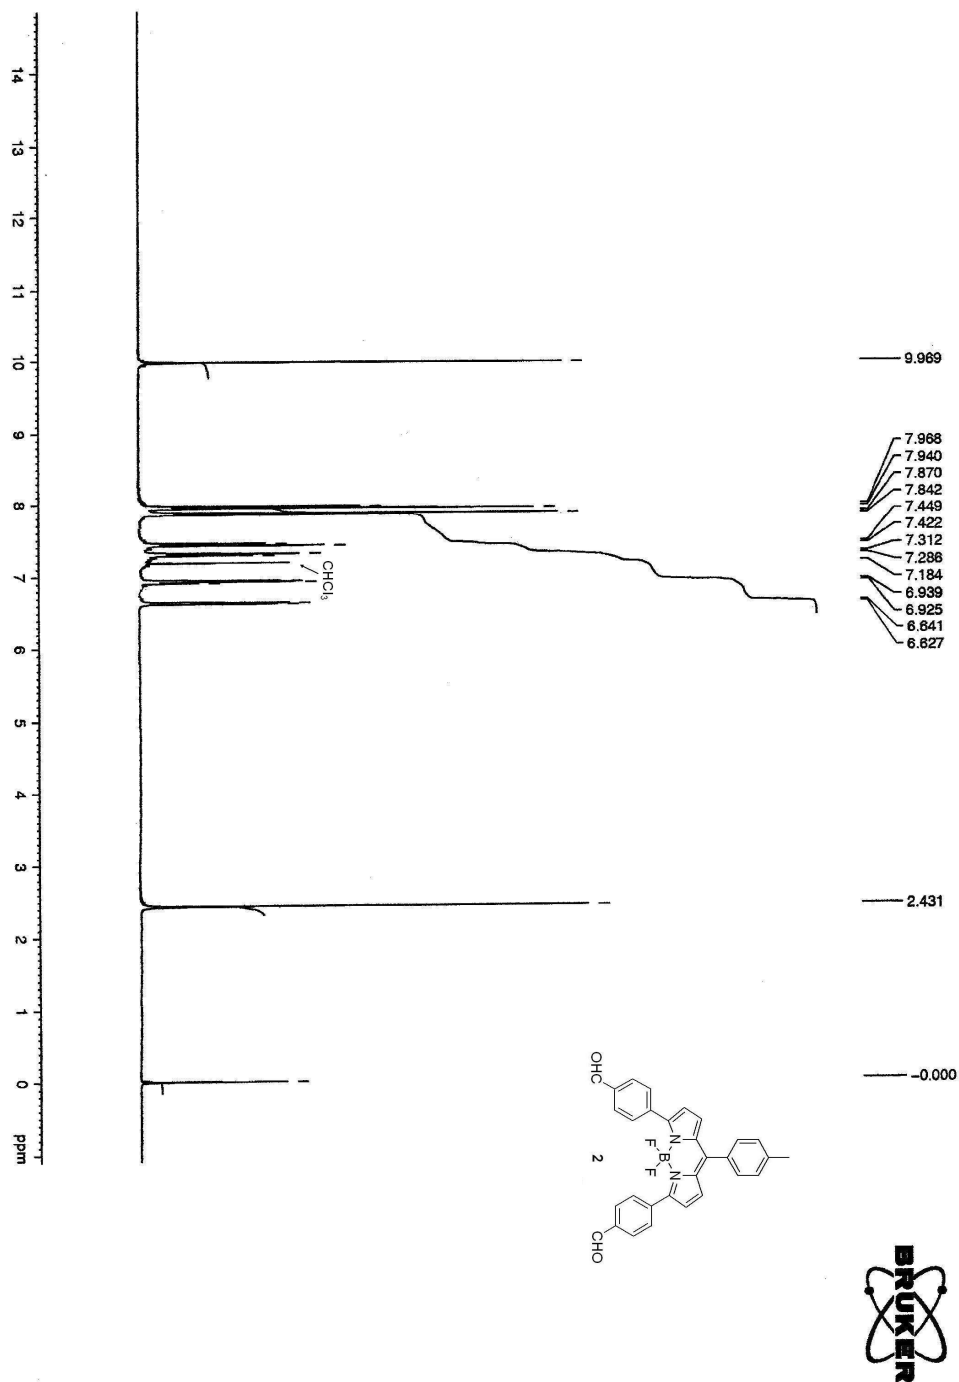

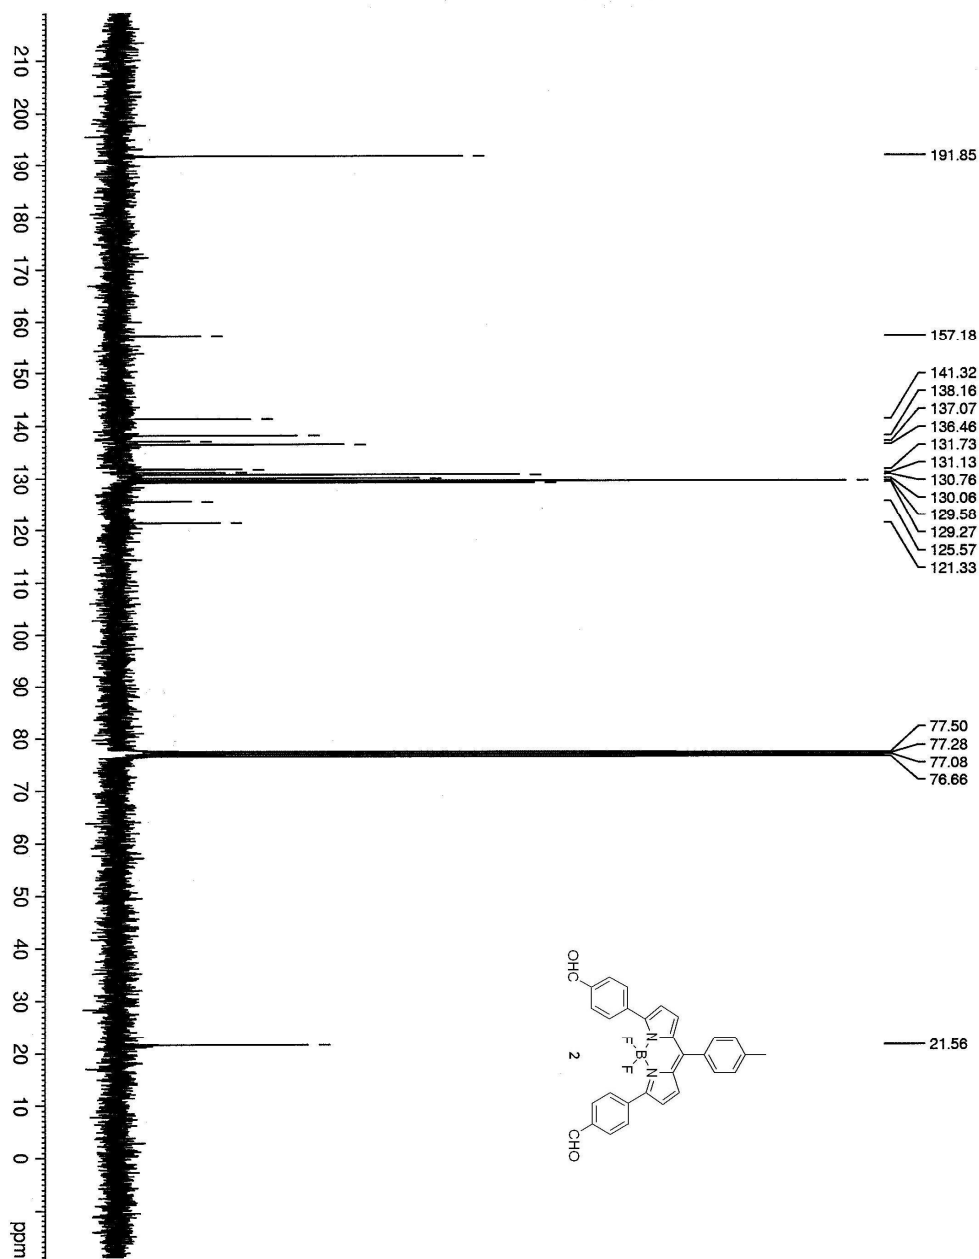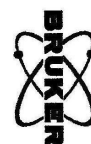

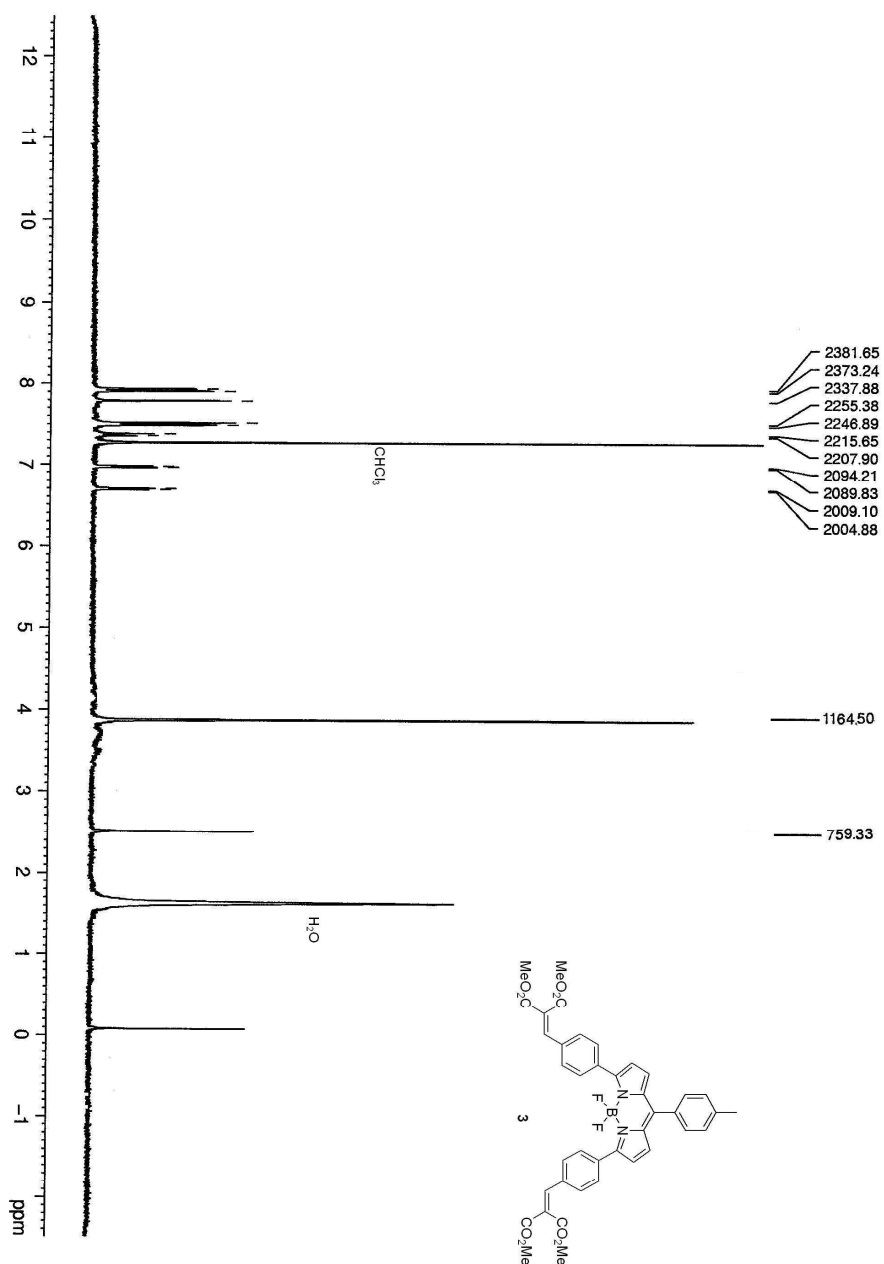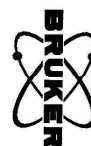



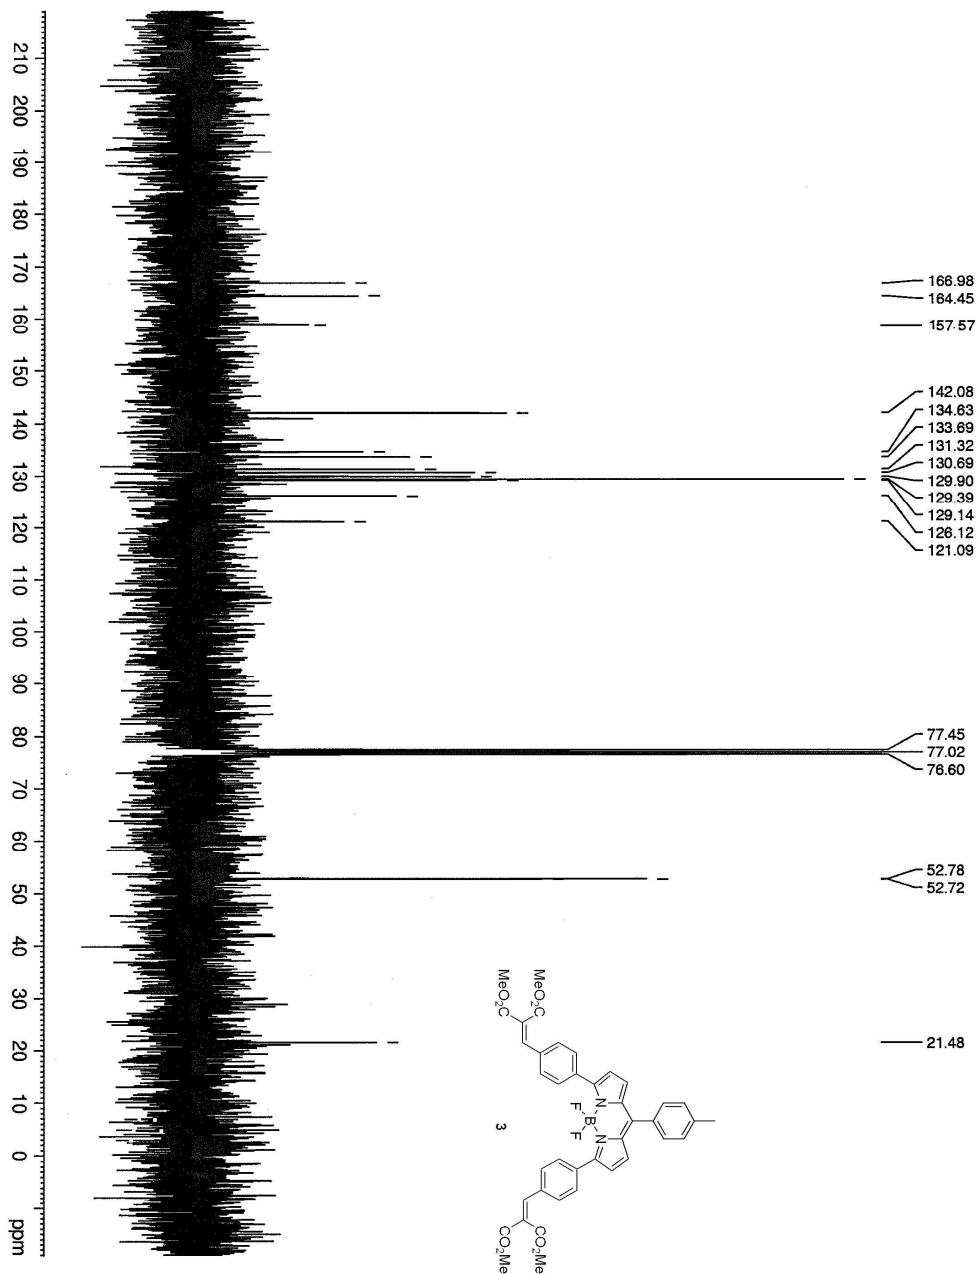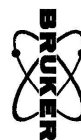

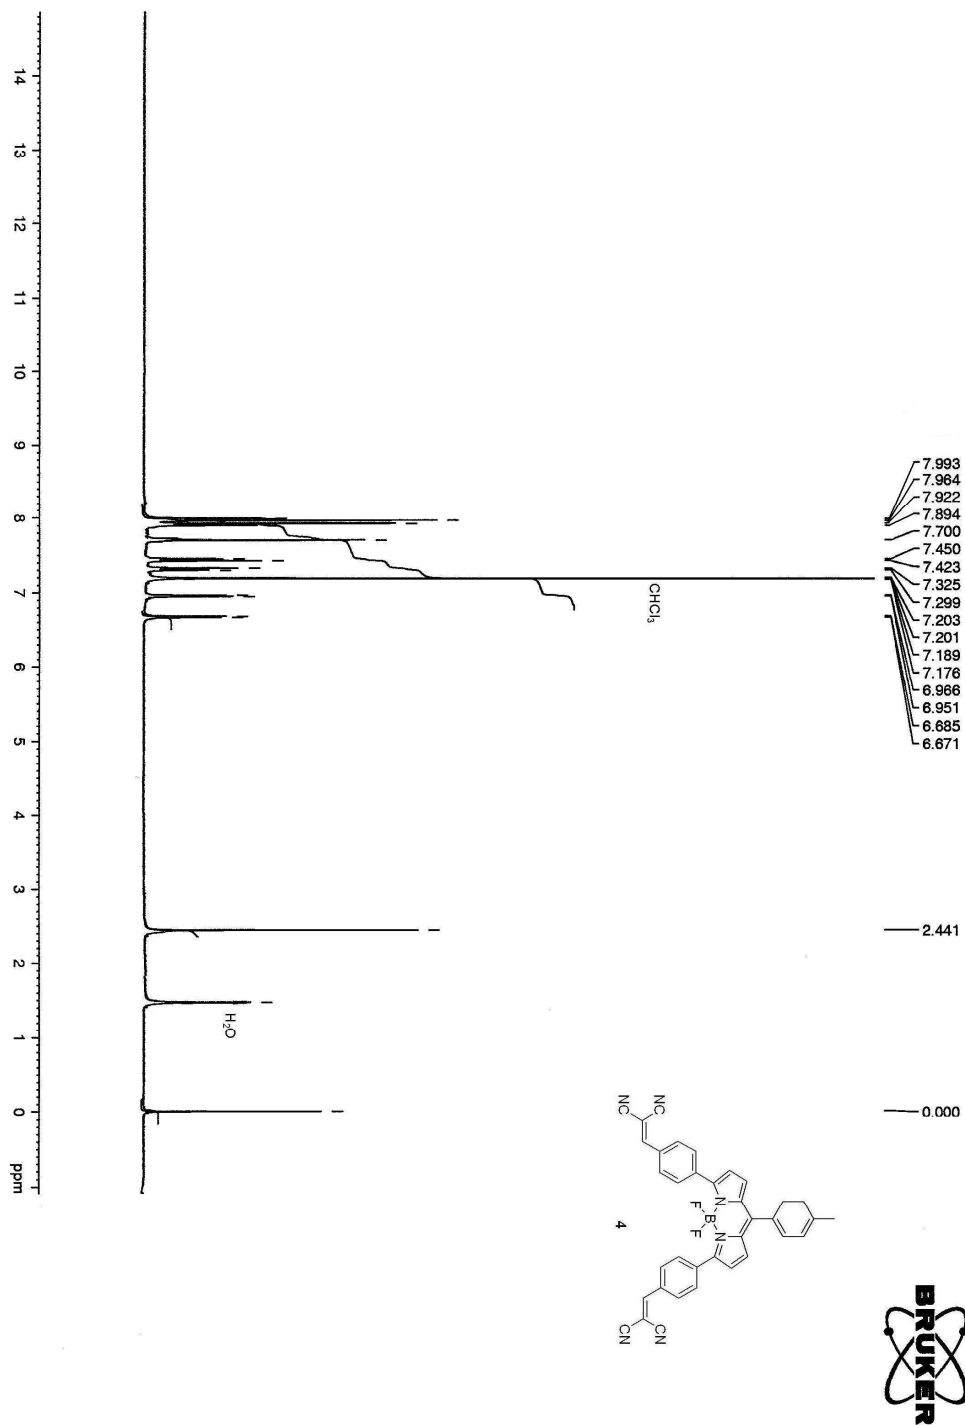

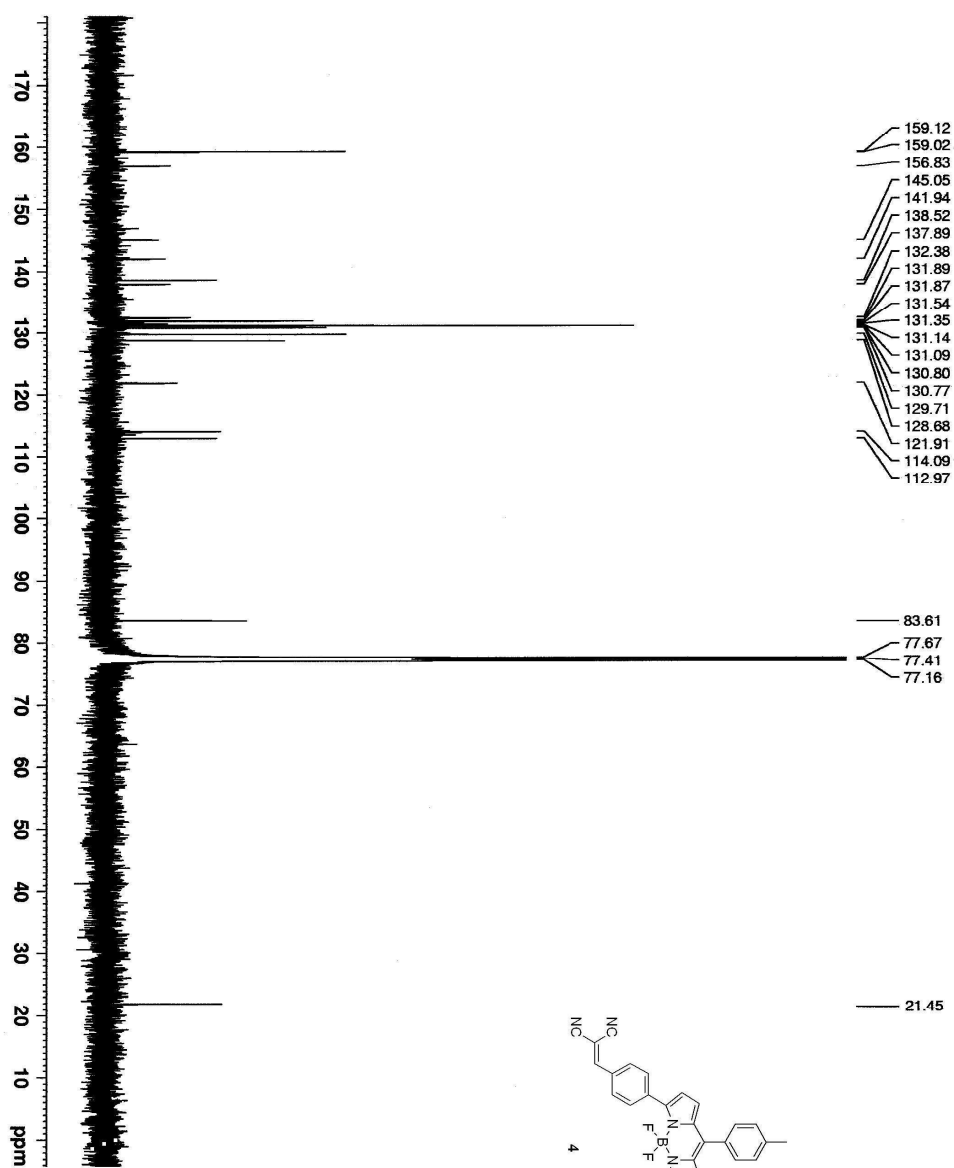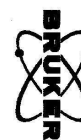

### Electronic density maps of the HOMO and LUMO orbitals for dyes 2 and 3

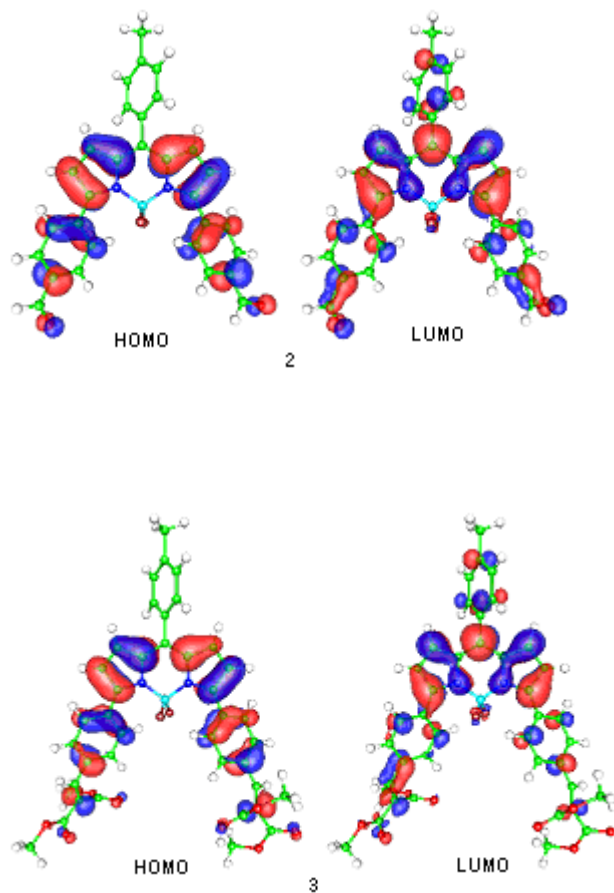

## References

- 1 W. Qin, T. Rohand, M. Baruah, A. Stefan, M. Van der Auweraer, W. Dehaen, N. Boens, *Chem. Phys. Lett.* 2006, **420**, 562-568.
